# Supplementary material for: The Multi-Ocean Distribution of the Hadal Amphipod, Hirondellea dubiaDahl, 1959 (Crustacea, Amphipoda)
Source: Frontiers journal article supplement (doi:10.3389/fmars.2022.824640), 2022-03-04
Supplement: Data_Sheet_1.xlsx [file Data_Sheet_1.xlsx]

## Sheet: Sheet1
Supplementary Material S1. Compilation of the historical literature records of the amphipod Hirondellea dubia.
Location	Ocean	Depth (m)	Latitude	Longitude	Expedition	Vessel	Year	Sampling gear	Reference
Clarion-Clipperton Zone - APEI 4	Central Pacific	4854	7.21558	-149.828	DeepCCZ expedition	RV Kilo Moana	2018	Baited, free-fall lander	Bribiesca-Contreras et al. 2021
Kermadec Trench	South Pacific	6000	-36.1678	-179.005	KAH0910	RV Kaharoa	2009	Baited, free-fall lander	Jamieson et al. 2011
Kermadec Trench	South Pacific	6007	-26.7317	-175.188	SO197	RV Sonne	2007	Baited, free-fall lander	Jamieson et al. 2011
Kermadec Trench	South Pacific	6709	-32.3783	-177.094	KAH1202	RV Kaharoa	2012	Baited, free-fall lander	Lacey et al. 2016
Kermadec Trench	South Pacific	6890	-26.8117	-175.302	SO197	RV Sonne	2007	Baited, free-fall lander	Jamieson et al. 2011
Kermadec Trench	South Pacific	7000	-32.5571	-177.243	KAH1109	RV Kaharoa	2011	Baited, free-fall lander	Lacey et al. 2016
Kermadec Trench	South Pacific	7018	-31.8689	-177.476	Woods Hole Oceanographic Institute (WHOI) cruise TN309	RV Thomas G Thompson	2014	Baited, free-fall lander	Leduc and Wilson 2016
Kermadec Trench	South Pacific	7139	-35.8396	-178.88	Woods Hole Oceanographic Institute (WHOI) cruise TN309	RV Thomas G Thompson	2014	Baited, free-fall lander	Leduc and Wilson 2016
Kermadec Trench	South Pacific	7225	-31.8295	-177.075	Woods Hole Oceanographic Institute (WHOI) cruise TN309	RV Thomas G Thompson	2014	Baited, free-fall lander	Leduc and Wilson 2016
Kermadec Trench	South Pacific	7251	-31.9135	-177.482	Woods Hole Oceanographic Institute (WHOI) cruise TN309	RV Thomas G Thompson	2014	Baited, free-fall lander	Leduc and Wilson 2016
Kermadec Trench	South Pacific	7291	-32.5871	-177.296	KAH1109	RV Kaharoa	2011	Baited, free-fall lander	Lacey et al. 2016
Kermadec Trench	South Pacific	7560	-31.9085	-177.482	Woods Hole Oceanographic Institute (WHOI) cruise TN309	RV Thomas G Thompson	2014	Baited, free-fall lander	Leduc and Wilson 2016
Kermadec Trench	South Pacific	7561	-35.085	-178.876	KAH0910	RV Kaharoa	2009	Baited, free-fall lander	Jamieson et al. 2011
Kermadec Trench	South Pacific	7884	-32.6164	-177.358	KAH1109	RV Kaharoa	2011	Baited, free-fall lander	Lacey et al. 2016
Kermadec Trench	South Pacific	7948	-34.362	-178.187	Woods Hole Oceanographic Institute (WHOI) cruise TN309	RV Thomas G Thompson	2014	Baited, free-fall lander	Leduc and Wilson, 2016
Kermadec Trench	South Pacific	7966	-26.9167	-175.512	SO197	RV Sonne	2007	Baited, free-fall lander	Jamieson et al., 2011
Kermadec Trench	South Pacific	8487	-32.6653	-177.465	KAH1202	RV Kaharoa	2012	Baited, free-fall lander	Lacey et al., 2016
Kermadec Trench	South Pacific	9053	-31.9785	-177.388	KAH1202	RV Kaharoa	2012	Baited, free-fall lander	Lacey et al., 2016
Kermadec Trench	South Pacific	9104	-32.1667	-177.252	Leg 9 of the Cook Cruise	RV Melville	2001	Baited, free-fall lander	Blankenship et al., 2006
Kermadec Trench	South Pacific	9198	-32.8447	-177.662	Woods Hole Oceanographic Institute (WHOI) cruise TN309	RV Thomas G Thompson	2014	Baited, free-fall lander	Leduc and Wilson, 2016
Kermadec Trench	South Pacific	9856	-23.0169	-177.35	Leg 9 of the Cook Cruise	RV Melville	2001	Baited, free-fall lander	Blankenship et al., 2006
Kermadec Trench	South Pacific	9908	-32.0266	-177.371	KAH1109	RV Kaharoa	2011	Baited, free-fall lander	Lacey et al., 2016
Kermadec Trench	South Pacific	10005	-31.931	-177.301	Woods Hole Oceanographic Institute (WHOI) cruise TN309	RV Thomas G Thompson	2014	Baited, free-fall lander	Leduc and Wilson, 2016
Kermadec Trench	South Pacific	7,640-7,680	-35.3333	-178.916	Galathea II Danish Deep Sea Expedition 1950-52	RV Galathea	1952	Trawl	Dahl, 1959
Mariana Trench	North Pacific	5469	18.8198	149.843	KR0716	RV Kairei	2007	Baited, free-fall lander	Ritchie et al., 2015
New Hebrides Trench	South Pacific	4700	-20.9347	168.477	KAH1310	RV Kaharoa	2013	Baited, free-fall lander	Lacey et al., 2016
New Hebrides Trench	South Pacific	6000	-20.7945	168.546	KAH1310	RV Kaharoa	2013	Baited, free-fall lander	Lacey et al., 2016
New Hebrides Trench	South Pacific	6228	-20.8218	168.583	KAH1310	RV Kaharoa	2013	Baited, free-fall lander	Lacey et al., 2016
New Hebrides Trench	South Pacific	6948	-20.6485	168.614	KAH1310	RV Kaharoa	2013	Baited, free-fall lander	Lacey et al., 2016
South Sandwich Trench	Southern	6640	-60.505	-25.5333	Five Deeps Expedition	DSSV Pressure Drop	2019	Baited, free-fall lander	Jamieson et al., 2021
South Sandwich Trench	Southern	7400	-60.4783	-25.5383	Five Deeps Expedition	DSSV Pressure Drop	2019	Baited, free-fall lander	Jamieson et al., 2021
South Sandwich Trench	Southern	7432	-60.4783	-25.5467	Five Deeps Expedition	DSSV Pressure Drop	2019	Baited, free-fall lander	Jamieson et al., 2021
South Sandwich Trench	South Atlantic	8082	-57.535	-23.9717	Five Deeps Expedition	DSSV Pressure Drop	2019	Baited, free-fall lander	Jamieson et al., 2021
South Sandwich Trench	South Atlantic	8265	-55.2298	-26.1731	Five Deeps Expedition	DSSV Pressure Drop	2019	Baited, free-fall lander	Jamieson et al., 2021
Tonga Trench	South Pacific	6250	-23.6	-174.379	QUELLE round-the-world expedition	RV Yokosuka	2013	Baited, free-fall lander	Wilson et al., 2018
Tonga Trench	South Pacific	7349	-17.2358	-172.151	Leg 9 of the Cook Cruise	RV Melville	2001	Baited, free-fall lander	Blankenship et al., 2006
Tonga Trench	South Pacific	8582	-24.1692	-175.035	Leg 9 of the Cook Cruise	RV Melville	2001	Baited, free-fall lander	Blankenship et al., 2006
Tonga Trench	South Pacific	8723	-17.3336	-172.268	Leg 9 of the Cook Cruise	RV Melville	2001	Baited, free-fall lander	Blankenship et al., 2006
Tonga Trench	South Pacific	8798	-24.135	-175.183	SO197	RV Sonne	2007	Baited, free-fall lander	Ritchie et al., 2015
Tonga Trench	South Pacific	9273	-24.1836	-175	Leg 9 of the Cook Cruise	RV Melville	2001	Baited, free-fall lander	Blankenship et al., 2006
Tonga Trench	South Pacific	10273	-23.0167	-174.819	Leg 9 of the Cook Cruise	RV Melville	2001	Baited, free-fall lander	Blankenship et al., 2006
Tonga Trench	South Pacific	10782	-23.2186	-174.718	Leg 9 of the Cook Cruise	RV Melville	2001	Baited, free-fall lander	Blankenship et al., 2006
Tonga Trench	South Pacific	10786	-23.2186	-174.718	Leg 9 of the Cook Cruise	RV Melville	2001	Baited, free-fall lander	Blankenship et al., 2006
Tonga Trench	South Pacific	10787	-23.2183	-174.718	Leg 9 of the Cook Cruise	RV Melville	2001	Baited, free-fall lander	Blankenship et al., 2006
Tonga Trench	South Pacific	10807	-23.2755	-174.747	QUELLE round-the-world expedition	RV Yokosuka	2013	Baited, free-fall lander	Wilson et al., 2018
References
Blankenship, L. E., Yayanos, A. A., Cadien, D. B., and Levin, L. A. (2006). Vertical zonation patterns of scavenging amphipods from the hadal zone of the Tonga and Kermadec trenches. Deep Sea Res. Part I Oceanogr. Res. Pap. 53, 48–61. doi: 10.1016/j.dsr.2005.09.006
Dahl, E. (1959). Amphipoda from depths exceeding 6000 m. Galathea Rep. 1, 211–240.
Jamieson, A. J., Kilgallen, N. M., Rowden, A. A., Fujii, T., Horton, T., Lörz, A. N., et al. (2011). Bait-attending fauna of the Kermadec Trench, SW Pacific Ocean: evidence for an ecotone across the abyssal-hadal transition zone. Deep Sea Res. Part I Oceanogr. Res. Pap. 58, 49–62. doi: 10.1016/j.dsr.2010.11.003
Jamieson, A. J., Stewart, H. A., Weston, J. N. J., and Bongiovanni, C. (2021b). Hadal fauna of the South Sandwich Trench, Southern Ocean: baited camera survey from the Five Deeps Expedition. Deep Sea Res. Part II Top. Stud. Oceanogr. 194:104987. doi: 10.1016/J.DSR2.2021.104987
Lacey, N. C., Rowden, A. A., Clark, M. R., Kilgallen, N. M., Linley, T., Mayor, D. J., et al. (2016). Community structure and diversity of scavenging amphipods from bathyal to hadal depths in three South Pacific Trenches. Deep Sea Res. Part I Oceanogr. Res. Pap. 111, 121–137. doi: 10.1016/j.dsr.2016.02.014
Leduc, D., and Wilson, J. (2016). Benthimermithid nematode parasites of the amphipod Hirondellea dubia in the Kermadec Trench. Parasitol. Res. 115, 1675–1682. doi: 10.1007/s00436-016-4907-7
Ritchie, H., Jamieson, A. J., and Piertney, S. B. (2015). Phylogenetic relationships among hadal amphipods of the Superfamily Lysianassoidea: implications for taxonomy and biogeography. Deep Sea Res. Part I Oceanogr. Res. Pap. 105, 119–131. doi: 10.1016/j.dsr.2015.08.014
Wilson, J. P. A., Schnabel, K. E., Rowden, A. A., Peart, R. A., Kitazato, H., and Ryan, K. G. (2018). Bait-attending amphipods of the tonga trench and depth-stratified population structure in the scavenging amphipod hirondellea dubia Dahl, 1959. PeerJ 7:e5994. doi: 10.7717/peerj.5994
