# Supplementary material for: The Multi-Ocean Distribution of the Hadal Amphipod, Hirondellea dubiaDahl, 1959 (Crustacea, Amphipoda)
Source: Frontiers journal article supplement (doi:10.3389/fmars.2022.824640), 2022-03-04
Supplement: Data_Sheet_2.xlsx [file Data_Sheet_2.xlsx]

## Sheet: Sheet1
Supplementary Material S2. Summary of the molecular data generated and complied by this study to investigate for evidence of cryptic diversity among the amphipod Hirondellea dubia across the Pacific, Southern, and Atlantic oceans. The table includes the GenBank sequence accession numbers 16S and COI, known sampling information, and literature references for each amphipod.
Superfamily	Morphospecies	Genetic Species	Location	Ocean	16S	COI	Isolate	Depth (m)	Latitude	Longitude	Station	Expedition	Reference	16S Tree	COI Tree
Alicelloidea	Alicella gigatea	Alicella gigatea	Wallaby-Zenith Fracture Zone	Indian	MK503196	MK503206	2	4932	-22.2096	102.506	L6	SO258	Weston et al. 2020	X	X
Lysianassoidea	Hirondellea dubia	Hirondellea dubia	Puerto Rico Trench	North Atlantic	OK641755	OK639161	dubia_PRT-8379_1	8378	19.7167	-67.3083	PRT_CL3_8400	Five Deeps Expedition	This Study	X	X
Lysianassoidea	Hirondellea dubia	Hirondellea dubia	Puerto Rico Trench	North Atlantic	OK641756	OK639162	dubia_PRT-8379_2	8378	19.7167	-67.3083	PRT_CL3_8400	Five Deeps Expedition	This Study	X	X
Lysianassoidea	Hirondellea dubia	Hirondellea dubia	Mariana Trench	North Pacific	OK641752	OK639158	dubia_MAR-5641	5641	12.6841	144.652	LH24	‘HADES-M’ cruise FK141109	This Study	X	X
Lysianassoidea	Hirondellea dubia	Hirondellea dubia	Mariana Trench	North Pacific	OK641753	OK639159	dubia_MAR-7716	7716	12.3326	144.671	LH23	‘HADES-M’ cruise FK141109	This Study	X	X
Lysianassoidea	Hirondellea dubia	Hirondellea dubia	Mariana Trench	North Pacific	OK641754	OK639160	dubia_MAR-8942	8942	12.1598	144.671	WT12	‘HADES-M’ cruise FK141109	This Study	X	X
Lysianassoidea	Hirondellea dubia	Hirondellea dubia	San Cristobal Trench	South Pacific	OK641761	OK639157	dubia_SCB-8407	8407	-11.2478	162.986	SOL_ER1_8200	Five Deeps Expedition	This Study	X	X
Lysianassoidea	Hirondellea dubia	Hirondellea dubia	Tonga Trench	South Pacific	OK641759	OK639165	dubia_TON-10817	10817	-23.2703	-174.74	TON_SK1_10800	Five Deeps Expedition	This Study	X	X
Lysianassoidea	Hirondellea dubia	Hirondellea dubia	South Sandwich Trench	Southern	OK641757	OK639163	dubia_SST-8265_1	8265	-55.2298	-26.1731	SST_FL3-8200	Five Deeps Expedition	This Study	X	X
Lysianassoidea	Hirondellea dubia	Hirondellea dubia	South Sandwich Trench	Southern	OK641758	OK639164	dubia_SST-8265_2	8265	-55.2298	-26.1731	SST_FL3-8200	Five Deeps Expedition	This Study	X	X
Lysianassoidea	Hirondellea dubia	Hirondellea dubia	Kermadec Trench	South Pacific	-	AY183359	-	9856	-23.0169	-177.35	-	Leg 9 of the Cook Cruise	Blankenship et al unpublished	-	X
Lysianassoidea	Hirondellea dubia	Hirondellea dubia	Clarion-Clipperton Zone	Central Pacific	-	MZ474328	GBC187	4854	7.21558	-149.828	APEI 4	DeepCCZ expedition	Bribiesca-Contreras et al. 2021	-	X
Lysianassoidea	Hirondellea dubia	Hirondellea dubia	Clarion-Clipperton Zone	Central Pacific	-	MZ474335	GBC198	4854	7.21558	-149.828	APEI 4	DeepCCZ expedition	Bribiesca-Contreras et al. 2021	-	X
Lysianassoidea	Hirondellea dubia	Hirondellea dubia	Mariana Trench	North Pacific	KP456069	KP713903	6	5469	18.8198	149.843	ST#01	KR0716	Ritchie et al. 2015	X	X
Lysianassoidea	Hirondellea dubia	Hirondellea dubia	Mariana Trench	North Pacific	KP456070	KP713904	5	5469	18.8198	149.843	ST#01	KR0716	Ritchie et al. 2015	X	X
Lysianassoidea	Hirondellea dubia	Hirondellea dubia	Kermadec Trench	South Pacific	KP456067	KP713906	8	7966	-26.9167	-175.512	ST#03	SO197	Ritchie et al. 2015	X	X
Lysianassoidea	Hirondellea dubia	Hirondellea dubia	Kermadec Trench	South Pacific	KP456068	KP713905	7	7966	-26.9167	-175.512	ST#03	SO197	Ritchie et al. 2015	X	X
Lysianassoidea	Hirondellea dubia	Hirondellea dubia	New Hebrides Trench	South Pacific	KP456071	KP713902	3	6948	-20.6485	168.614	ST#27	KAH1310	Ritchie et al. 2015	X	X
Lysianassoidea	Hirondellea dubia	Hirondellea dubia	New Hebrides Trench	South Pacific	KP456072	KP713901	1	6948	-20.6485	168.614	ST#27	KAH1310	Ritchie et al. 2015	X	X
Lysianassoidea	Hirondellea dubia	Hirondellea dubia	Tonga Trench	South Pacific	KP456065	KP713908	2	8798	-24.135	-175.183	ST#04	SO197	Ritchie et al. 2015	X	X
Lysianassoidea	Hirondellea dubia	Hirondellea dubia	Tonga Trench	South Pacific	KP456066	KP713907	4	8798	-24.135	-175.183	ST#04	SO197	Ritchie et al. 2015	X	X
Lysianassoidea	Uristes sp. nov	Hirondellea dubia	Tonga Trench	South Pacific	KP456063	KP713947	1 HR-2015	8798	-24.135	-175.183	ST#04	SO197	Ritchie et al. 2015	X	X
Lysianassoidea	Uristes sp. nov	Hirondellea dubia	Tonga Trench	South Pacific	KP456064	KP713948	2 HR-2015	8798	-24.135	-175.183	ST#04	SO197	Ritchie et al. 2015	X	X
Lysianassoidea	Hirondellea dubia	Hirondellea dubia	Kermadec Trench	South Pacific	KX034251	-	i1	-	-	-	-	-	Ritchie et al. 2017	X	-
Lysianassoidea	Hirondellea dubia	Hirondellea dubia	Kermadec Trench	South Pacific	KX034252	-	i2	-	-	-	-	-	Ritchie et al. 2017	X	-
Lysianassoidea	Hirondellea dubia	Hirondellea dubia	Kermadec Trench	South Pacific	KX034253	-	i3	-	-	-	-	-	Ritchie et al. 2017	X	-
Lysianassoidea	Hirondellea dubia	Hirondellea dubia	Kermadec Trench	South Pacific	KX034254	-	i4	-	-	-	-	-	Ritchie et al. 2017	X	-
Lysianassoidea	Hirondellea dubia	Hirondellea dubia	Kermadec Trench	South Pacific	KX034255	-	i5	-	-	-	-	-	Ritchie et al. 2017	X	-
Lysianassoidea	Hirondellea dubia	Hirondellea dubia	Kermadec Trench	South Pacific	KX034256	-	i6	-	-	-	-	-	Ritchie et al. 2017	X	-
Lysianassoidea	Hirondellea dubia	Hirondellea dubia	Kermadec Trench	South Pacific	KX034257	-	i7	-	-	-	-	-	Ritchie et al. 2017	X	-
Lysianassoidea	Hirondellea dubia	Hirondellea dubia	Kermadec Trench	South Pacific	KX034258	-	i8	-	-	-	-	-	Ritchie et al. 2017	X	-
Lysianassoidea	Hirondellea dubia	Hirondellea dubia	Kermadec Trench	South Pacific	KX034259	-	i9	-	-	-	-	-	Ritchie et al. 2017	X	-
Lysianassoidea	Hirondellea dubia	Hirondellea dubia	Kermadec Trench	South Pacific	KX034260	-	i10	-	-	-	-	-	Ritchie et al. 2017	X	-
Lysianassoidea	Hirondellea dubia	Hirondellea dubia	Kermadec Trench	South Pacific	KX034261	-	i11	-	-	-	-	-	Ritchie et al. 2017	X	-
Lysianassoidea	Hirondellea dubia	Hirondellea dubia	Kermadec Trench	South Pacific	KX034262	-	i12	-	-	-	-	-	Ritchie et al. 2017	X	-
Lysianassoidea	Hirondellea dubia	Hirondellea dubia	Kermadec Trench	South Pacific	KX034263	-	i13	-	-	-	-	-	Ritchie et al. 2017	X	-
Lysianassoidea	Hirondellea gigas	Hirondellea gigas	Mariana Trench	North Pacific	OK641760	OK639181	gigas_MAR-7949	7949	12.3037	144.68	WT06	‘HADES-M’ cruise FK141109	This Study	X	X
Lysianassoidea	Hirondellea dubia	Hirondellea sp.	Clarion-Clipperton Zone	Central Pacific	-	MZ474413	GBC292	4084	11.5015	-153.617	APEI 1	DeepCCZ expedition	Bribiesca-Contreras et al. 2021	-	X
Lysianassoidea	Hirondellea sp.	Hirondellea sp. AT-2018	Atacama Trench	South Pacific	OL376315	OL379344	AT-6714	6714	-21.7416	-71.2578	ST#45	SO261	This Study	X	X
Lysianassoidea	Hirondellea sp.	Hirondellea sp. AT-2018	Atacama Trench	South Pacific	OL376314	OL379343	AT-8052	8052	-23.3796	-71.3447	ST#87	SO261	This Study	X	X
References
Bribiesca-Contreras, G., Dahlgren, T. G., Horton, T., Drazen, J. C., Drennan, R., Jones, D. O. B., et al. (2021). Biogeography and connectivity across habitat types and geographical scales in Pacific abyssal scavenging amphipods. Front. Mar. Sci. 8:1028. doi: 10.3389/FMARS.2021.705237
Ritchie, H., Jamieson, A. J., and Piertney, S. B. (2015). Phylogenetic relationships among hadal amphipods of the Superfamily Lysianassoidea: implications for taxonomy and biogeography. Deep Sea Res. Part I Oceanogr. Res. Pap. 105, 119–131. doi: 10.1016/j.dsr.2015.08.014
Ritchie, H., Jamieson, A. J., and Piertney, S. B. (2017). Genome size variation in deep-sea amphipods. R. Soc. Open Sci. 4. doi:10.1098/rsos.170862.
Weston, J. N. J., Peart, R. A., and Jamieson, A. J. (2020). Amphipods from the Wallaby-Zenith Facture Zone, Indian Ocean: new genus and two new species identified by integrative taxonomy. Syst. Biodivers. 18, 57–78. doi: 10.1080/14772000.2020.1729891
